# Supplementary material
Source: PubMed Central journal article supplement (PMC3128400)
Supplement: supp_amiajnl-2011-000101_2011_JAMIA-2011-000101_Wei_Appendix.pdf [file supp_amiajnl-2011-000101_2011_JAMIA-2011-000101_Wei_Appendix.pdf]

## Appendix

### The Model-Averaged Naive Bayes (MANB) Algorithm

This appendix contains a set of equations that describe the MANB algorithm. From this description, it is straightforward to code the algorithm. We proceed in a top-down fashion, describing first the main inference task and then successively decomposing it into its parts.

Let  $X$  denote a set of  $n$  discrete-valued predictor variables, namely  $\{X_1, X_2, \dots, X_n\}$ . Let  $\mathbf{x}$  denote an instantiation (setting) of the variables in  $X$  in some test case. Suppose variable  $X_i$  has  $r_i$  possible values that are coded by the integers from 1 to  $r_i$ . We say that  $r_i$  is the dimensionality of  $X_i$ . For example,  $X_i$  could represent a SNP that has three genotype values and one value denoting a missing measurement, and those values could be encoded as 1, 2, 3, and 4. Let  $x_i$  be the value that is assigned to variable  $X_i$  in a given patient case. According to our encoding of values,  $x_i$  could be any number from 1 to  $r_i$ . We will sometimes use  $x_i$  as shorthand for  $X = x_i$ . Let  $T$  denote the discrete-valued target variable to be predicted. Let  $t$  denote an arbitrary value of  $T$ . Let  $r_T$  denote the dimensionality of  $T$ . For example, in the disease dataset that we studied,  $T$  denotes late onset Alzheimer's disease (LOAD), and it has the values *absent* (= 1) and *present* (= 2).

From Bayes theorem, we obtain the following equation:

$$P_a(t|\mathbf{x}) = \frac{P_a(\mathbf{x}|t)P(t)}{\sum_{t'=1}^{r_T} P_a(\mathbf{x}|t')P(t')} \quad (1)$$

The subscript "a" in Equation 1 denotes a model-averaged probability. We assume that the predictors are conditionally independent of each other, given the value of the target  $T$ , and thus we obtain the following:

$$P_a(\mathbf{x}|t) = \prod_{i=1}^n P_a(x_i|t). \quad (2)$$

We estimate each of the terms in Equation 2 using training dataset  $D$  and prior probabilities that are described below. Assume that  $D$  has  $N$  cases (samples). In the LOAD dataset that we studied,  $D$  consists of SNP values and a LOAD diagnosis for each of 1411 patient cases. In reference (1) it is proved that model averaging over all  $2^n$  naive Bayes models is equivalent to using the following value for each term in Equation 2:

$$P_a(x_i|t) = P(T \rightarrow X_i | D) \cdot P(x_i|t, D) + P(T \dots X_i | D) \cdot P(x_i|D), \quad (3)$$

where  $T \rightarrow X_i$  designates that  $T$  and  $X_i$  are probabilistically dependent and  $T \dots X_i$  designates that they are independent. When they are dependent, we use the conditional probability  $P(x_i|t, D)$  to estimate  $P_a(x_i|t)$ . When they are independent, we use  $P(x_i|D)$ . Equation 3 can be viewed as

using model averaging (regarding whether a relationship between  $T$  and  $X_i$  is present or not) to provide smoothing of the probability  $P_a(x_i | t)$  that is being estimated by Equation 3. This smoothing is in addition to the smoothing that we will do in estimating  $P(x_i | t, D)$  and  $P(x_i | D)$  (see below), which also appear in Equation 3.

Once we have derived  $P_a(x_i | t)$  for each value  $x_i$  (of variable  $X_i$ ) and each value  $t$  (of target  $T$ ) we can use those probabilities in Equations 1 and 2 to calculate the posterior probability over  $T$  for any instantiation  $\mathbf{x}$  of the predictor variables. For each predictor variable  $X_j$  that has no assigned value in a given patient case, we simply do not include the term  $P_a(x_j | t)$  in Equation 2.<sup>1</sup>

We now describe how each of the terms in Equation 3 is derived. Let  $N_{ijk}$  denote the number of times in database  $D$  that variable  $X_i$  has the value  $k$  when target  $T$  has the value  $j$ . We pre-compute and store these  $N_{ijk}$  counts for use below. To keep the notation simple, we will assume that  $x_i$  equals the value  $k$  and  $t$  equals the value  $j$ . Let  $N_{ij} = \sum_{k=1}^{r_i} N_{ijk}$ . Let  $N_i = \sum_{j=1}^{r_T} N_{ij}$ . Note that for all  $i$ ,  $N_i = N$ , where  $N$  is the total number of cases in training dataset  $D$ . Finally, let  $N_{i^*k} = \sum_{j=1}^{r_T} N_{ijk}$ . We estimate the distribution  $P(x_i | t, D)$  by assuming that every possible such distribution is equally likely *a priori*, and then integrating over all of them to obtain the following expectation (2):

$$P(x_i | t, D) = \frac{N_{ijk} + 1}{N_{ij} + r_i}.$$

Similarly, we estimate  $P(x_i | D)$  as follows:

$$P(x_i | D) = \frac{N_{i^*k} + 1}{N_i + r_i}.$$

We will now derive  $P(T \rightarrow X | D)$  and  $P(T \dots X | D)$  in Equation 3.

$$P(T \rightarrow X_i | D) = \frac{P(D_i | T \rightarrow X_i) \cdot P(T \rightarrow X_i)}{P(D_i | T \rightarrow X_i) \cdot P(T \rightarrow X_i) + P(D_i | T \dots X_i) \cdot P(T \dots X_i)}, \quad (4)$$

where  $D_i$  denotes the data on just  $T$  and  $X_i$  in  $D$ . Assuming for now that we can compute the right side of Equation 4, we apply it and the following equations to derive  $P(T \dots X_i | D)$  and  $P(T \rightarrow X_i | D)$ , which are needed in Equation 3:

$$P(T \dots X_i | D) = \frac{P(D_i | T \dots X_i) \cdot P(T \dots X_i)}{P(D_i | T \rightarrow X_i) \cdot P(T \rightarrow X_i) + P(D_i | T \dots X_i) \cdot P(T \dots X_i)} \quad (5)$$

---

<sup>1</sup> An alternative approach is to include a special value labeled "MISSING" for each predictor variable. If a predictor has a missing value in a given case to be predicted, its value is instantiated to be the value MISSING. This approach allows a missing value to be informative. We used this approach in the algorithm described in the main paper.

We now discuss calculating the terms on the right side of Equation 4. The term  $P(T \rightarrow X_i)$  is our prior probability that  $T$  and  $X_i$  are probabilistically dependent, and  $P(T \dots X_i) = 1 - P(T \rightarrow X_i)$ . For example, for the LOAD dataset that we studied, we used  $P(T \rightarrow X_i) = 20 / 312,318$ .

We derive  $P(D_i | T \rightarrow X_i)$  in Equation 4 as follows, based on assumptions described in (1-3):

$$P(D_i | T \rightarrow X_i) = \prod_{j=1}^{r_i} \left( \frac{(r_i - 1)!}{(N_{ij} + r_i - 1)!} \cdot \prod_{k=1}^{r_i} N_{ijk}! \right) \quad (6)$$

Note that the values of the factorial function can be pre-computed and stored in an array, and thus, its use above will correspond to a simple array access.

In a manner similar to Equation 6, we derive  $P(D_i | T \dots X_i)$  in Equation 4 as follows:

$$P(D_i | T \dots X_i) = \frac{(r_i - 1)!}{(N_i + r_i - 1)!} \cdot \prod_{k=1}^{r_i} N_{i^*k}! \quad (7)$$

To provide an indication of which variables most strongly predict target  $T$ , we can sort the predictor variables according to  $P(T \rightarrow X_i | D)$ , as given by Equation 4, and output the top  $c$  predictors, along with their probabilities, where  $c$  is a user-specified value.

### A Logarithmic Version of MANB

The terms in the above equations can readily become so small that they cause problems in maintaining adequate numerical precision. Thus, it is better to calculate them in logarithmic form. This section parallels the above section, while presenting the equations in a logarithmic form. We will use natural logarithms, denoted by the function  $\ln$ . We will use  $\exp(x)$  to denote  $e^x$ .

$$\ln(P_a(t | \mathbf{x})) = \ln(P_a(\mathbf{x} | t)) + \ln(P(t)) - \ln \text{Denom}, \quad (1')$$

where  $\ln \text{Denom}$  is a function that is specified by the following pseudocode:

```

s := -∞;
for t' := 1 to rT
  s := lnAdd(s, ln(Pa(x | t')) + ln(P(t')));
return s.

```

The function  $\ln \text{Add}(x, y)$ , which appears above and is defined below, takes two arguments  $x$  and  $y$  that are in logarithmic form and returns  $\ln(e^x + e^y)$ . However, it does so in a way that preserves a good deal of numerical precision that could be lost if  $\ln(e^x + e^y)$  were calculated in a direct manner. The value  $-\infty$  in the above pseudocode can be implemented in practice by using the

largest negative number that can be represented by the computer on which the code is running, as for example  $-1 \times 10^{+4931}$ .

Once we have computed  $\ln(P_a(t | \mathbf{x}))$  for each value of  $t$ , as shown in Equation 1', we simply exponentiate each term to obtain the posterior probabilities of interest:  $P_a(t | \mathbf{x}) = \exp(\ln(P_a(t | \mathbf{x})))$ .

The remainder of this section shows how to derive the terms on the right side of Equation 1' in a manner that is parallel to the previous section.

$$\ln(P_a(\mathbf{x} | t)) = \sum_{i=1}^n \ln(P_a(x_i | t)). \quad (2')$$

$$\ln(P_a(x_i | t)) = \ln(\text{Add}(\ln(P(T \rightarrow X_i | D)) + \ln(P(x_i | t, D)), \ln(P(T \dots X_i | D)) + \ln(P(x_i | D)))). \quad (3')$$

$$\begin{aligned} \ln(P(T \rightarrow X_i | D)) &= \ln(P(D_i | T \rightarrow X_i)) + \ln(P(T \rightarrow X_i)) - \\ &\ln(\text{Add}(\ln(P(D_i | T \rightarrow X_i)) + \ln(P(T \rightarrow X_i)), \ln(P(D_i | T \dots X_i)) + \ln(P(T \dots X_i)))). \end{aligned} \quad (4')$$

$$\begin{aligned} \ln(P(T \dots X_i | D)) &= \ln(P(D_i | T \dots X_i)) + \ln(P(T \dots X_i)) - \\ &\ln(\text{Add}(\ln(P(D_i | T \rightarrow X_i)) + \ln(P(T \rightarrow X_i)), \ln(P(D_i | T \dots X_i)) + \ln(P(T \dots X_i)))). \end{aligned} \quad (5')$$

$$\ln(P(D_i | T \rightarrow X_i)) = \sum_{j=1}^{r_i} \left( \ln((r_i - 1)!) - \ln((N_{ij} + r_i - 1)!) + \sum_{k=1}^{r_i} \ln(N_{ijk}!) \right) \quad (6')$$

$$\ln(P(D_i | T \dots X_i)) = \ln((r_i - 1)!) - \ln((N_i + r_i - 1)!) + \sum_{k=1}^{r_i} \ln(N_{i*k}!). \quad (7')$$

Note that to improve efficiency, the logarithms of the factorials can be pre-computed and stored. Let  $\lnfact(w)$  be a function that returns  $\ln(w!)$ . In the pseudocode that follows, we assume that these function values are stored in an array that is also called  $\lnfact$ , which we distinguish by using square brackets. We can efficiently construct this array using the following iterative method:

```

lnfact[0] := 0;
m := N + max_{i=1}^n (r_i); // N is the number of cases in the training dataset D
for w := 1 to m
    lnfact[w] := lnfact[w-1] + ln[w];

```

The `lnAdd` function was used above in several equations, and it is defined as follows:

```
function lnAdd(x, y)
  if  $y > x$  then
    temp := x;
    x := y;
    y := temp;
  return  $\ln(1 + \exp(y - x)) + x$ . // Note that  $\exp(y - x)$  computes  $e^{(y-x)}$ .
```

A Java implementation of the MANB algorithm is available at <http://www.dbmi.pitt.edu/cooperlab/overview> by following the link there to Software.

## References

1. Dash D, Cooper G. Exact model averaging with naive Bayesian classifiers. In: Sammut C, Hoffmann AG, editors. Proceedings of the 19th International Conference on Machine Learning; 2002 July 8 -12; Sydney, New South Wales, Australia. Morgan Kaufmann; 2002. p. 91-8.
2. Cooper G, Herskovits E. A Bayesian method for the induction of probabilistic networks from data Machine Learning. 1992;9(4):309-47.
3. Heckerman D, Geiger D, Chickering D. Learning Bayesian networks: The combination of knowledge and statistical data. Machine Learning. 1995;20:197-243.
